# Supplementary material for: Brief communication: Glacier thickness reconstruction on Mt. Kilimanjaro
Source: Copernicus journal article supplement (doi:10.5194/tc-2019-310), 2020-02-03
Supplement: Supplementary file 1 [file tc-2019-310-supplement.pdf]

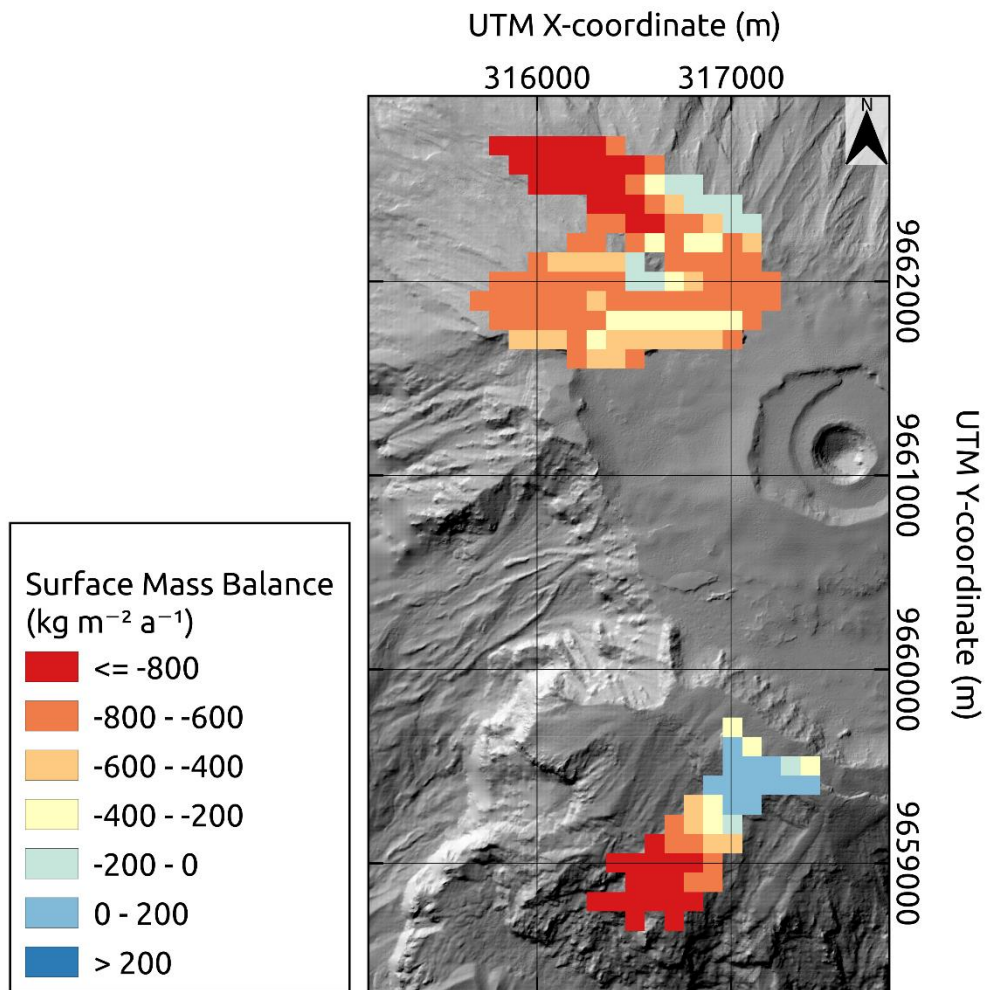

**Supplementary Figure 1: Spatial distribution of the mean annual surface mass balance ( $\text{kg m}^{-2}$ ) from 2005-2013 generated with the distributed, physically-based MB model by Mölg et al. (2008, 2009a). Background: hillshade of the KILISoSDM (Sirguy and Cullen 2013).**

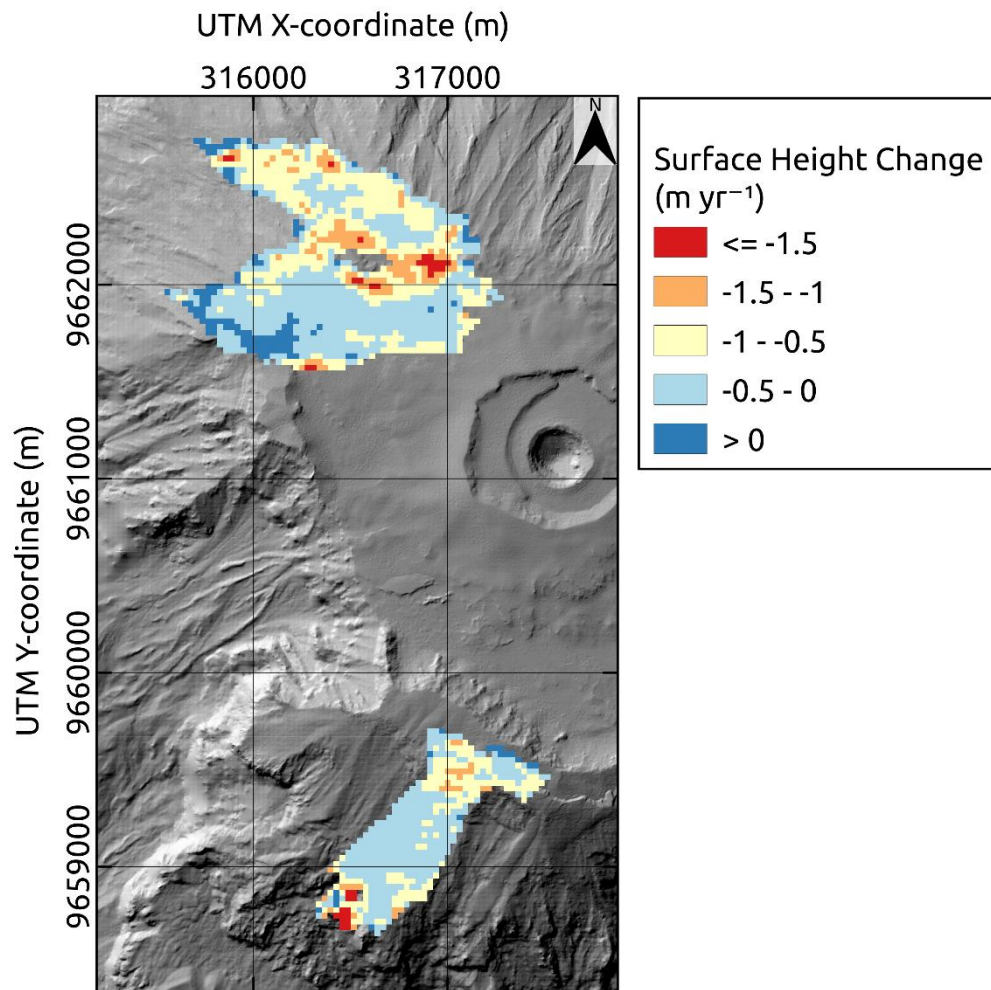

**Supplementary Figure 2: Spatial distribution of mean annual surface height change (m) from 2000-2011. The mean annual surface height change was generated from the difference between the SRTM DEM (2000) and the TanDEM-X DEM (2011). Background: hillshade of the KILISoSDM (Sirguy and Cullen 2013).**
